# Supplementary material for: Sensory Plasticity Caused by Up-down Regulation Encodes the Information of Short-term Learning and Memory
Source: Research Square preprint supplement (doi:10.21203/rs.3.rs-4917555/v1), 2024-09-24
Supplement: Supplementary file 1 [file 2533300a90c5522442a910a4.docx]

**Supplementary table 2**

**Table S2.** ***C. elegans* strains used in this study**

| **Strain** | **Genotype** |
| --- | --- |
| N2 Bristol | *Wild-type* |
| RB1349 | *frpr-10*(*ok1504*) IV |
| tm1377 | *egl-3*(*tm1377*) V |
| VC2490 | *W07E11*&*flp-2*(*gk1039*) X |
| PS9050 | *flp-4*(*sy1606*) II |
| VC3280 | *F15A4.5*(*gk3259*) II; *flp-5*(*gk3123*)X |
| VC2324 | *flp-6*(*ok3056*) V |
| RB1990 | *flp-7*(*ok2625*) X |
| PT501 | *flp-8*(*pk360*) X |
| RB2067 | *flp-9*(*ok2730*) IV |
| RB1989 | *flp-10*(*ok2624*) IV |
| HBR507 | *flp-11*(*tm2706*) X |
| RB1863 | *flp-12*(*ok2409*) X |
| tm2427 | *flp-13*(*tm2427*) IV |
| VC1957 | *flp-14*(*gk1055*) III; *sfxn1.2*(*gk3039*) II |
| VC2504 | *flp-15*(*gk1186*) III |
| RB2275 | *flp-16*(*ok3085*) II |
| VC2016 | *flp-18*(*gk3063*) X |
| RB982 | *flp-21*(*ok889*) V |
| tm4749 | *flp-23*(*tm4749*) III |
| VC1971 | *flp-24*(*gk3109*) III |
| VC2012 | *flp-27*(*gk3331*); Y17G7B(*gk1062*) II; *gkDF45* X |
| MT13113 | *tdc-1*(*n3419*) II |
| MT9455 | *tbh-1*(*n3247*) X |
| RB1161 | *tbh-1*(*ok1196*) X |
| tm1846 | *tyra-2*(*tm1846*) X |
| tm1815 | *tyra-2*(*tm1815*) X |
| CX11839 | *tyra-3*(*ok325*) X |
| OH313 | *ser-2*(*pk1357*) X |
| tm2913 | *lgc-55*(*tm2913*) V |
| VC224 | *octr-1*(*ok371*) X |
| DA1774 | *ser-3*(*ad1774*) I |
| RB1622 | *ser-3*(*ok1995*) I |
| tm2146 | *ser-6*(*tm2146*) IV |
| tm2104 | *ser-6*(*tm2104*) IV |
| DA609 | *npr-1*(*ad609*) X |
| CB4856 | *C. elegans* wild isolate |
| XA3702 | *npr-2*(*ok419*)IV; *unc-80*(*pd48*)V |
| tm1782 | *npr-4*(*tm1782*) X |
| RB761 | *npr-7*(*ok527*)X |
| RB799 | *npr-11*(*ok594*) X |
| tm1504 | *npr-13*(*tm1504*) V |
| RB1836 | *npr-14*(*ok2375*) I |
| tm2048 | *npr-15*(*tm2048*) III |
| RB1365 | *npr-16*(*ok1541*) X |
| tm3210 | *npr-17*(*tm3210*) III |
| *tm4386* | *npr-20*(*tm4386*) II |
| VC2421 | *npr-24*(*ok3192*) X |
| RB1837 | *frpr-4*(ok2376)II |
| tm6135 | *frpr-6*(*tm6135*) V |
| tm1097 | *frpr-8*(*tm1097*) X |
| tm7561 | *frpr-15*(*tm7561*) V |
| tm12489 | *frpr-19*(*tm12489*) IV |
| VC2171 | *tkr-1*(*ok2886*) III |
| CX14295 | *pdfr-1*(*ok3425*) III |
| RB1340 | *nlp-1*(*ok1469*) X |
| RB1609 | *nlp-5*(*ok1981*) II |
| tm1990 | *nlp-7*(*tm1990*) X |
| tm6232 | *nlp-10*(*tm6232*) III |
| RB607 | *nlp-12*(*ok335*) I |
| VC1108 | *nlp-14*(*ok1517*) X |
| VC1063 | *nlp-15*(*ok1512*) I |
| tm2569 | *nlp-21*(*tm2569*) III |
| tm5531 | *nlp-23*(*tm5531*) X |
| tm1712 | *nlp-29*(*tm1712*) V |
| tm5156 | *nlp-36*(*tm5156*) III |
| tm4393 | *nlp-37*(*tm4393*) X |
| tm6398 | *nlp-38*(*tm6398*) I |
| LSC27 | *pdf-1*(*tm1996*) III |
| tm4393 | *pdf-2(tm4393)* X |
| ZXW2492 | *flp-14*(*gk1055*) III |
| ZXW2493 | *flp-14*(*gk1055*) III; *frpr-10*(*ok1504*) IV |
| ZXW2494 | *tyra-2*(*tm1846*) X; frpr-10(ok1504) IV |
| ZXW2495 | *hkdEx24*95[*frpr-1p*::*frpr-1*(*RNAi*)::*unc-54 3’*UTR; *vha-6p*::*GFP*] |
| ZXW2496 | *hkdEx24*96[*frpr-2p*::*frpr-2*(*RNAi*)::*unc-54 3’*UTR; *vha-6p*::*GFP*] |
| ZXW2497 | *hkdEx249*7[*frpr-7p*::*frpr-7*(*RNAi*)::*unc-54 3’*UTR; *vha-6p*::*GFP*] |
| ZXW2498 | *hkdEx24*98[*frpr-9p*::*frpr-9*(*RNAi*)::*unc-54 3’*UTR; *vha-6p*::*GFP*] |
| ZXW2499 | *hkdEx24*99[*frpr-17p*::*frpr-17*(*RNAi*)::*unc-54 3’*UTR; *vha-6p*::*GFP*] |
| ZXW2500 | *hkdEx25*00[*npr-24p*::*npr-24*(*RNAi*)::*unc-54 3’*UTR; *vha-6p*::*GFP*] |
| ZXW2501 | *hkdEx25*01[*npr-39p*::*npr-39*(*RNAi*)::*unc-54 3’*UTR; *vha-6p*::*GFP*] |
| ZXW2501 | *hkdEx2502*[*npr-41p*::*npr-41*(*RNAi*)::*unc-54 3’*UTR; *vha-6p*::*GFP*] |
| ZXW2503 | *hkdEx2503*[*npr-1p*::*npr-1*::*sl2dGFP*; *vha-6p*::*GFP*]; *npr-1*(*ad609*) |
| ZXW2504 | *hkdEx2504*[*npr-24p*::*npr-24*::*sl2dGFP*; *vha-6p*::*GFP*]; *npr-24*(*ok3192*) |
| ZXW2505 | *hkdEx250*5[*frpr-10p*::*frpr-10*::*sl2dGFP*; *vha-6p*::*GFP*]; *frpr-10*(*ok1504*) |
| ZXW2506 | *hkdEx25*06[*flp-11p*::*frpr-10*::*sl2dGFP*; *vha-6p*::*GFP*]; *frpr-10*(*ok1504*) |
| ZXW2507 | *hkdEx25*07[*frpr-10p*::*frpr-10*(*RNAi*)::*unc-54 3’*UTR; *lin-44p*::*GFP*] |
| ZXW2508 | *hkdEx25*08[*frpr-10p*(*1 kb*)::*GFP*::*unc-54 3’*UTR; *lin-44p*::*GFP*] |
| ZXW2509 | *hkdEx25*09[*frpr-10p*(*2 kb*)::*GFP*::*unc-54 3’*UTR; *lin-44p*::*GFP*] |
| ZXW2510 | *hkdEx2510*[*frpr-10p*(*4 kb*)::*GFP*::*unc-54 3’*UTR; *lin-44p*::*GFP*] |
| ZXW2511 | *hkdEx2511*[*frpr-10p*::*GFP*::*unc-54 3’*UTR; *nlr-1p*::*TagRFP-t*::*unc-54 3’*UTR; *lin-44p*::*GFP*] |
| ZXW2512 | *hkdEx2512*[*frpr-10p*::*GFP*::*unc-54 3’*UTR; *flp-11p*::*TagRFP-t*::*unc-54 3’*UTR; *lin-44p*::*GFP*] |
| ZXW2513 | *hkdEx2513*[*frpr-10p*::*GFP*::*unc-54 3’*UTR; *unc-47p*::*TagRFP-t*::*unc-54 3’*UTR; *lin-44p*::*GFP*] |
| ZXW2514 | *hkdEx2514*[*frpr-10p*::*TeTx*::*unc-54 3’*UTR; *vha-6p*::*GFP*] |
| ZXW2515 | *hkdEx2515*[*frpr-10p*::*inx-6*(*RNAi*)::*unc-54 3’*UTR; *vha-6p*::*GFP*] |
| ZXW2516 | *hkdEx2516*[*frpr-10p*::*inx-7*(*RNAi*)::*unc-54 3’*UTR; *vha-6p*::*GFP*] |
| ZXW2517 | *hkdEx2517*[*frpr-10p*::*unc-9*(*RNAi*)::*unc-54 3’*UTR; *vha-6p*::*GFP*] |
| ZXW2518 | *hkdEx2518*[*frpr-10p*::*unc-25*(*RNAi*)::*unc-54 3’*UTR; *vha-6p*::*GFP*] |
| ZXW2519 | *hkdEx2519*[*flp-14p*::*GFP*::*unc-54 3’*UTR; *gcy-5p*::*TagRFP-t*; *lin-44p*::*GFP*] |
| ZXW2520 | *hkdEx2520*[*flp-14p*::*GFP*::*unc-54 3’*UTR; *gcy-7p*::*TagRFP-t*; *lin-44p*::*GFP*] |
| ZXW2521 | *hkdEx2521*[*flp-14p*::*GFP*::*unc-54 3’*UTR; *ops-1p*::*TagRFP-t*; *lin-44p*::*GFP*] |
| ZXW2522 | *hkdEx2522*[*flp-14p*::*flp-14*::*sl2d*::*GFP*; *vha-6p*::*GFP*] |
| ZXW2523 | *hkdEx2523*[*ops-1p*::*flp-14*::*sl2d*::*GFP*; *vha-6p*::*GFP*] |
| ZXW2524 | *hkdEx2524*[*gcy-5p*::*flp-14*::*sl2d*::*GFP*; *vha-6p*::*GFP*] |
| ZXW2525 | *hkdEx2525*[*gcy-7p*::*flp-14*::*sl2d*::*GFP*; *vha-6p*::*GFP*] |
| ZXW2526 | *hkdEx2526*[*gcy-5p*::*R-GECO1.0*; *lin-44p*::*GFP*] |
| ZXW2527 | *hkdEx2527*[*tdc-1p*::*tdc-1*::*sl2d*::*GFP*; *vha-6p*::*GFP*]; *tdc-1*(*n3419*) |
| ZXW2528 | *hkdEx2528*[*tbh-1p*::*tdc-1*::*sl2d*::*GFP*; *vha-6p*::*GFP*]; *tdc-1*(*n3419*) |
| ZXW2529 | *hkdEx2529*[*gcy-13p*::*tdc-1*::*sl2d*::*GFP*; *vha-6p*::*GFP*]; *tdc-1*(*n3419*) |
| ZXW2530 | *hkdEx2530*[*tbh-1p*::*tbh-1*::*sl2d*::*GFP*; *vha-6p*::*GFP*]; *tbh-1*(*n3247*) |
| ZXW2531 | *hkdEx2531*[*tdc-1p*::*TeTx*::*sl2d*::*GFP*; *vha-6p*::*GFP*] |
| ZXW2532 | *hkdEx2532*[*tbh-1p*::*TeTx*::*sl2d*::*GFP*; *vha-6p*::*GFP*] |
| ZXW2533 | *hkdEx2533*[*gcy-13p*::*TeTx*::*sl2d*::*GFP*; *vha-6p*::*GFP*] |
| ZXW2534 | *hkdEx2534*[*tyra-2p*::*tyra-2*::*sl2d*::*GFP*; *vha-6p*::*GFP*]; *tyra-2*(*tm1846*) |
| ZXW2535 | *hkdEx2535*[*ops-1p*::*tyra-2*::*sl2d*::*GFP*; *vha-6p*::*GFP*]; *tyra-2*(*tm1846*) |
| ZXW2536 | *hkdEx2536*[*gcy-5p*::*tyra-2*::*sl2d*::*GFP*; *vha-6p*::*GFP*]; *tyra-2*(*tm1846*) |
| ZXW2537 | *hkdEx2537*[*gcy-7p*::*tyra-2*::*sl2d*::*GFP*; *vha-6p*::*GFP*]; *tyra-2*(*tm1846*) |
| ZXW2538 | *hkdEx2538*[*unc-86p*::*tyra-2*::*sl2d*::*GFP*; *vha-6p*::*GFP*]; *tyra-2*(*tm1846*) |
| ZXW2539 | *hkdEx2539*[*gcy-7p*::*tyra-2*::*sl2d*::*GFP*; *vha-6p*::*GFP*]; *tyra-2*(*tm1846*) |
| ZXW2540 | *hkdEx2540*[*sra-6p*::*tyra-2*::*sl2d*::*GFP*; *vha-6p*::*GFP*]; *tyra-2*(*tm1846*) |
| ZXW2541 | *hkdEx2541*[*flp-17p*::*tyra-2*::*sl2d*::*GFP*; *vha-6p*::*GFP*]; *tyra-2*(*tm1846*) |
| ZXW2542 | *hkdEx2542*[*gcy-23p*::*tyra-2*::*sl2d*::*GFP*; *vha-6p*::*GFP*]; *tyra-2*(*tm1846*) |
| ZXW2543 | *hkdEx2543*[*glr-1p*::*tyra-2*::*sl2d*::*GFP*; *vha-6p*::*GFP*]; *tyra-2*(*tm1846*) |
| ZXW2544 | *hkdEx2544*[*frpr-10p*::*tyra-2*::*sl2d*::*GFP*; *vha-6p*::*GFP*]; *tyra-2*(*tm1846*) |
| ZXW2545 | *hkdEx2545*[*gcy-5p*::*R-GECO1.0*; *lin-44p*::*GFP*]; *flp-14*(*gk1055*) |
| ZXW2546 | *hkdEx2546*[*gcy-5p*::*flp-14*::*sl2d*::*GFP*; *gcy-5p*::*R-GECO1.0*; *lin-44p*::*GFP*]; *flp-14*(*gk1055*) |
| ZXW2547 | *hkdEx2547*[*gcy-5p*::*R-GECO1.0*; *lin-44p*::*GFP*]; *frpr-10*(*ok1504*) |
| ZXW2548 | *hkdEx2548*[f*rpr-10p*::*frpr-10*::*sl2d*::*GFP*; *gcy-5p*::*R-GECO1.0*; *lin-44p*::*GFP*]; *frpr-10*(*ok1504*) |

| ZXW2549 | *hkdEx2549*[*gcy-5p*::*R-GECO1.0*; *lin-44p*::*GFP*]; *tdc-1*(*n3419*) |
| --- | --- |
| ZXW2550 | *hkdEx2550*[*thb-1p*::*tdc-1*::*sl2d*::*GFP*; *gcy-5p*::*R-GECO1.0*; *lin-44p*::*GFP*]; *tdc-1*(*n3419*) |
| ZXW2551 | *hkdEx2551*[*gcy-5p*::*R-GECO1.0*; *lin-44p*::*GFP*]; *tyra-2*(*tm1846*) |
| ZXW2552 | *hkdEx2552*[*gcy-5p*::*tyra-2*::*sl2d*::*GFP*; *gcy-5p*::*R-GECO1.0*; *lin-44p*::*GFP*]; *tyra-2*(*tm1846*) |
| ZXW2553 | *hkdEx2553*[*tbh-1p*::*TeTx*::*sl2d*::*GFP*; *gcy-5p*::*R-GECO1.0*; *lin-44p*::*GFP*] |
| ZXW2554 | *hkdEx2554*[*gcy-5p*::*R-GECO1.0*; *lin-44p*::*GFP*]; *egl-3*(*gk238*) |
| ZXW2555 | *hkdEx2555*[*gcy-5p*::*R-GECO1.0*; *lin-44p*::*GFP*]; *unc-9*(*fc16*) |
| ZXW2556 | *hkdEx2556*[*gcy-5p*::*R-GECO1.0*; *lin-44p*::*GFP*]; *unc-25*(*ok1901*) |
| ZXW2557 | *hkdEx2557*[*ttx-3p*::*G-CaMP3.0*; *lin-44p*::*GFP*] |
| ZXW2558 | *hkdEx2558*[*frpr-10p*::*ntsr-1(human)*::*sl2d*::*GFP*; *vha-6p*::*GFP*]; *frpr-10*(*ok1504*) |
| ZXW2559 | *hkdEx2559*[*frpr-10p*::*ntsr-1(rat)*::*sl2d*::*GFP*; *vha-6p*::*GFP*]; *frpr-10*(*ok1504*) |
| ZXW2560 | *hkdEx2560*[*tbh-1p*::*HisCl*::*sl2d*::*GFP*; *vha-6p*::*GFP*] |
| ZXW2561 | *hkdEx2561*[*gcy-5p*::*HisCl*::*sl2d*::*GFP*; *vha-6p*::*GFP*] |
| ZXW2562 | *hkdEx2562*[*frpr-10p*::*HisCl*::*sl2d*::*GFP*; *vha-6p*::*GFP*] |
| ZXW2563 | *hkdEx2563*[*octr-1p*::*octr-1*::*sl2d*::*GFP*; *vha-6p*::*GFP*]; *octr-1*(*ok371*) |
| ZXW2564 | *hkdEx2564*[*sra-6p*::*octr-1*::*sl2d*::*GFP*; *vha-6p*::*GFP*]; *octr-1*(*ok371*) |
| ZXW2565 | *hkdEx2565*[*gpa-4p*::*octr-1*::*sl2d*::*GFP*; *vha-6p*::*GFP*]; *octr-1*(*ok371*) |
| ZXW2566 | *hkdEx2566*[*cat-2p*::*octr-1*::*sl2d*::*GFP*; *vha-6p*::*GFP*]; *octr-1*(*ok371*) |
| ZXW2567 | *hkdEx2567*[*frpr-10p*::*octr-1*::*sl2d*::*GFP*; *vha-6p*::*GFP*]; *octr-1*(*ok371*) |
| ZXW2568 | *hkdEx2568*[*T19C4.5p*::*TeTx*::*sl2d*::*GFP*; *vha-6p*::*GFP*] |
