# Supplementary material for: Sensory Plasticity Caused by Up-down Regulation Encodes the Information of Short-term Learning and Memory
Source: Research Square preprint supplement (doi:10.21203/rs.3.rs-4917555/v1), 2024-09-24
Supplement: Supplementary file 2 [file 614d431cc4d4cad0bb30ee89.xlsx]

## Sheet: AlphaFold2 Prediction
Supplemental table1
neuropeptide receptor gene	The length of sequence	Receptor sequence	The number of model match
npr-1 AF9-R1 C39E6.6	457	MEVENFTDCQVYWKVYPDPSQSIYAIVPFLTVYLFLFFLGLFGNVTLIYVTCSHKALLSVQNIFILNLAASDCMMCILSLPITPITNVYKNWYFGNLLCHLIPCIQGISIFVCTFSLGAIALDRYILVVRPHSTPLSQRGAFLTTVLLWILSFVVTLPYAFNMQMIEYTEERICGYFCTEKWESAKSRRAYTMIVMLAQFVVPFAVMAFCYANIVSVLSKRAQTKIRKMVERTSALESSCAFPSHGLEQYENELNEFLDKQEKEKQRVVLQNRRTTSILVTMVVWFGITWLPHNVISLIIEYDDTQSFFRLYGRDDYDISYLLNLFTHSIAMSNNVLNPVLYAWLNPSFRQLVIKTYFGDRRKSDRIINQTSVYKTKIVHDTKHLNGRAKIGGGGSHEA…	5
npr-2 CELE_T05A1.1 T05A1.1	387	MINETEETCDRYIDKHPDMTNEPTVLVTFSLLYLHIFLLGILGNSAVLYLTMKHRQLQTVQNIFILNLCASNVLMCLTSLPITFITNVYKQWFFSSPVCKLIPLVQGASIFVSTFSLSAIALDRYNLVVRPHKQKLSSRSAMMIALLIWVISVVVCMPYGWYMDVEKLNGLCGEYCSEHWPLAEVRKGYTFLVLITQFLFPFATMAFCYYNIFSRLRQRVETKLKKLSERSQLLENSTTCGTTNHIVSINAEAVQNGLENKQRLAVLAQQRRTTTILSCMVLLFAFTWLPHNVVTLMIEYDGFFFHSDETSATSTDHTYIVSMTAHLISMLTNVTNPFLYAWLNPMFKEMLIKTLRGGSKSPKPADIKQTSFIRMPNSGAPSQSSYL	5
npr-10 C53C7.1 CELE_C53C7.1	365	MSSSNHCIDIRAYLWQTKHDLTLHPIPIAILATIYTIIVVVGVTGNLLVVMSVMRFKVLQSVRNMFIVSLSVSDIFVAIVSGSVTPITAFSKVWLFGGPLCHLLPLLQGTALSFSTLTLTAIAIDRYILICHPTKEPIRKDQALKMISFNSAISVGLSVPLFMKQELMQFRNYCGEYCSENWGPDAYLRSVYGTVVFIIQFVFPLITITFCYASISIKLRRGVFVRGSQKELMSEARRQLTQRRLRTNRMLIIMTVTFALSWLPSVGFNFLRDYSALPGIIDSQDYLFGIIFHCISMTSVIVNPFLYGYCNEHFRAAFAALLDTVKAACGMRRVSPGNPACSQLLSTHFESTTRRSVTTTIPSSI	5
npr-17 C06G4.5	436	MSTNLVDYVDDSYLNQSMNSENGLDSVTQIMYDMKKYNIVNDVLPPPNHEDLHVVIMAVSYLLLFLLGTCGNVAVLTTIYHVIRSSRATLDNTLIYVIVLSCVDFGVCLSLPITVIDQILGFWMFGKIPCKLHAVFENFGKILSALILTAMSFDRYAGVCHPQRKRLRSRNFAITILLVLAVYAFITLCPLLWSFTAREIILYAKETAPGMLTRMKIEKCTVDIDSQMFTAFTIYQFILCYCTPLVLIAFFYTKLLSKLREHTRTFKSSQIPFLHISLYTLAVACFYFLCWTPFWMATLFAVYLENSANSSSVPPVFVYIMYFIHALPFTNSAINWILYGALNGQLQQRYRSNRSNSTKKTTTTTASTALLEKKITNLNTNSNYQVNGSMNSIATAAPT…	5
npr-42 C01F1.4 CELE_C01F1.4	333	MDSNVKYFMYEIFIPSIIILCCVAAFLNFMVVISRLYCKMRSASLELTYSLALSDTWTSIVIGFSLFWNSYKPVVLNIPHSSYCFPLTLEAFRTGGLLTGIFHLVALAFTHYMTIKRPFDHHKVLPIRTIYIMIFFMWATPPMALMIYFASNSGQGYQSEKCMGIKFYENFYFRALVSLIIVFLIILTTIFYIKMLQKITEVRSKTASNSQTLGASARGRRTVVTAVLIFGTFLIGWMPASILYILTAESMPLYNKHSVSITIMSIAVLVSIMAKTLCNPIIYATRIPEINQFVFQKLLYRVLPGRNPTIRRQSELEPLKTRCSQPNAHSVML	5
npr-24 CELE_R106.2 R106.2	373	MMNNTNEQNFTEVIDPIKTVAHLTWCLTALIGIPANLFVLAAIVYFRDMRTISNIYIFNLAVADLLFLCGIPVSLFAQSSHDGWIWGPIMCKLYISGNAVSQFASAVFIAILSFDRYLAVCRPIQSKSFRTTQAAFALSVAAWIMVILEMTPLFLFVKLIKSSSAGEARGGSCMLFVGNVTVLESATEMNETLLNEIEQNMLASRRFFISYTFALSYLIPLVAVWYFYFKIILKMCQRKRQMQTKRTATKKRTTKVTIMGLAIVISYTHCWLPFWIVQWSIEANLFEKSKYLLFCCTHFAFALQYINSAANPFLYVFLSDSFQKNIQKLLRTAKPDKQIMLKNSTDPQDTSKMLNVTNNPLYSSATNSHYSSC	5
frpr-1 C02B8.5	378	MEGLNMSLECTPASRSNGTCYGLAVCGYCYDFVETRQVVKEYEQFNLVVIGLMLPLIGCLGLIGNALSAFTYSRREMISSLNVYLFALACSDIVIILTAFFLFFLENMRKRSEWATYYFAVLSPVMFPLGLTAQTMSVFITVASAFDCLVLVAASEKFKSKFCSVNTSILVGNFNDFKNVIVCLKIIVKIFLLGIFYNSPHMYEIYVIDCWSTMYNTASKDVCPTALRSNVDYVRIYYVYMYTIVMAVGPVLLLIVINTAIVISMRRSSSPNSESDIITLVLVVCLFISCNVLPLTVNFLELLFGIINSYLIDLSNLMVVVNSSCNFLIYYTFGSNFRRTLRYYVRAALNRRAPAQNAANNRTPPRVKLCLPPTEVLI	5
frpr-14 CELE_K07E8.5 K07E8.5	349	MEPSTIELLDFEPPPIFCNSCLGSTDPEYLTYNLAVSGVLLAIVGMIGLIGNMLVVKTYLHPEQAIHSTSIYLAALAFSDFFLVLTAMFLFVLEAWRHHDYPTLAYLYVIGAPIVFPVAAVFQTSSVYFCVAAAVDCFIMVVLPESVKQLYCTPRRAKITCVVLMLICFIYNIPHFFELEKVDCLDEDGRDSMQICPTDIRLDPAYYAIYYTYMYTTFLAIGPLTLLILLNICVVFTVVTKGSSNENGEDDTISLILVVFFFIFCNFTALMVNFMEIILNDPSMLVYFVDLSNLLVVVNGTANFFCYLIFGTSFRATLKKVVLGSPAKRSAVLWINDEEHKNQQSHALI	5
frpr-2 C05E7.4 CELE_C05E7.4	353	MLNHTVVMRECECLHEPIEGYAGVANLLLIVISLPLISFVGVVLNFFNIFIFCDQKNTAAKYLTALSCSDVGVCMAGIFVICSDSLRAHSFVIDQVFVFLLPKIIPLGLFFQMLSVYITVLAAFDCFYSVYCGTKCEPKRSTWAPRVLALVVISVAGYNIVQFGDLQAIECLHPDNYTLFELCPTEMRVSETYVIVYKGYLYALSMAFLPFVLLTFLTVSIIVMLRRKNETMHMDKAEKEECEDDGGNNPVVLLLVVLLFLCCNLTSLLVNVFEMLKFNMAFETEAVLIDIGNFLVVINATANFFVYMGSSEEFRSSFYQRIRQLWRPKSTRLPLLHDHRIRLFNRNPVASSI	5
npr-7 CELE_F35G8.1 F35G8.1	380	MNIDSNLTDFQCEYPAIDIGIHMKTLLAVGYGLVGALSLVGNLAVLLIVICRREMQTVTNIFISSVSAADLVITSFSLWATPLAYYQRVWHFGKYMCYMVSIIQGLSLMWVPLTLAAVALDRYSLVASPFRQPMSKKTCLLIIAGIWMGGFAVLSPMIRMVDFVDSYGPCHFCLESWDHDKQHYRLFYGLSVLVIRSAIPLVLISLCHWRIAVILNTQTKKFQTLRSASTVTQSTDIRRKQRLQTLLLAMVVIFAVSSLPLDLSNVLQDLIVVYQVRPVPDNVRHFIFFFCHWTAMAGTLLNPLVYAYYNENFRRQIQTCFGEMRGQGEFKRGLYSIVSGRYSYRETFRADDEENHHRQNTRIELANNQTGDIEVLRTDL	4
npr-5 CELE_Y58G8A.4 Y58G8A.4	433	MVSSAATISTISTTTTPSTISNVITSHSNNGSCIQIAEAIAAQGIDDITVDFYIRSIFTFLYGFLFVLGIFGNGGVLWAVARNKRLQSARNVFLLNLIFTDLILVFTAIPVTPWYAMTKDWAFGSVMCHLVPLSNSCSVFVTSWSLTAISLDKFLHINDPTKQPVSIRQALAITFLIWIVSTLINLPYLMSFEHVDGSFYVQPGETPYCGHFCDEANWQSENSRKIYGTTVMLLQFVVPMAVITYCYFKILQKVSKDMIIQNAQFCQSLTQKQRSDATSRKKKVNYILIAMVVTFIGCWLPLTLLNLVKDFKKEPEWLKRQPFFWAINAHVIAMSLVVWNPLLFFWLTRKQKRSGLSKILNSTEIVSSFASRVSNSIRRSTFRRNNIDRVRKKQVVLDC…	4
npr-41 B0334.6 CELE_B0334.6	394	MDELITLEGASQSEQIIGSHDFCNFSNITHHEHDEQSISIVWWSNVAVLPVIALIGLACNLLNMAVLTSNKTARRIPSWNLLIALAVCDSLFLIFATLDVTPLSIPSLAFSTSFNHFYSRIVLYIRTLASTFYKSSVLIVVAFNIERYLCVVCPLNSHRWCTSRNSKNAIATAIVLSFLCSIQWPLAYDTIRCFESNSNQYYYVILMSTNRALQIYYRTMDYVSLFAFNVLPIIGLLYMNSRIIFTLRRVVDEDSRKYEETKLSDGLIQHDAHNNRTMRANAMLFAVVFMLFFCVGPQAPARILFDMYGQYHPKAILYVCLSQQLVFLNASLNFCLYCVVSKRYRTLMKQTLKKFLHKLEGVDHPFQINLKQTKSSSAHVTSLEDHHAHLIQNV	4
npr-39 CELE_F57A8.4 F57A8.4	396	MSTISPDIVTNSTEEVAECSRNETYDFNRYALIVYVGTPIAVAGVICNWILFRLFTKSKSTKSPALYLLLLAVLDLLMDLLYIPFFTVDALAIYHKNEFLYHIWHDYAMFVFGLSRLVQFASTYIILCATIERFIVVAEINSLDFLISSTGRFVTIGITFLGVAILRLPAFFEYFITYRPDCPLYENYDYTPILASWEHYQMFNFYVMTVLHIFVPFALLLMLNISIVVVTKRKLTGIGWAVTTFIDMPKVSEMIRKESINSNKRRRDELRYATWTMVSIATTYLCCSSLSLFIGILENVWPENTLLFQEDGSSTKFYTFASDAVSILVAVNSLLRIVVYSLCSPNFRKQLVKEYPCLKCLTCGSDGDEKAKKIKEEKKLFIGYQNLIMGARVDML	4
frpr-4 C54A12.2 CELE_C54A12.2	362	MMDSMDFHRIMAFVYLPTILIGLLGNLLSLYAYSRKNRKSMVGFLLYSLSVSDIFLLVFALPLFSIMYLPIWTDEQRSFVVAYTAKYVYPLCMMAKTCSLYIMVLITIERWIAVCRPLEVQIWCRYTTSSYSIAAIITFAVVLNFARFFEFEIEYIDGLAFFRRDLLDSEKHWWYFMFYFIIISIIFDYLVPFVIMFVANMLIISELRRTKKERSLMTIQQQKEQNTTVMLLVITIFFGFCHFFSMALKLAESFVGKFLTIQNIYLEMLGEIFNYLIIIHTASTFFIYYMFSEKFRQIIKGIWKPDQYRHGSLPDGTLNITDSKKRKINRHGSSTKIMYHTEATIIHKPASLKTRYSRISSE	4
frpr-15 CELE_K10C8.2 K10C8.2	444	MTSNRAILRSGMSLDDEFNKCQEIEFTHAQFLFRSYLFPFVYLFGIISNSINICVFSQKSMRNHTVNWFFLALSFSDLLTLVASIFVFSVPVYAENSHNPEYIDLSVQLIVWFYPLAQIGLTMSVYVTILVSVHRYLGVCHPFLIRRISNSNAVKAVIVAAIVFAFVFNASRWFELHAQPCSFGTEGQTNSSVVYPTSLMMNRMYTLIFRNAAYTIVMFFLPFAILTYVNLRIIATLKQSYKMRKAMTTSRSKRSDSTVPTDTIVTKIDGYSAVVPVENGEKGNGILMGGANNGSVKNDKKENGVTVMLVAITTEFLLFNLIAFATNIIELSSIRFFADLETLLVELSTFLVNVNGASTIIIYLIFGSKYRNVFIRLFRKNLGHNFCGKSPKRPIGYSQ…	4
frpr-9 CELE_F53B7.2 F53B7.2	532	MTSTVIYVPDIQELPECEPSVFNDIQATIRLFGGMPIAIFGFITNVINVIVFCDPEMRCSLVNHFLLVLSISDLVLLVCNFFMLIFPVIASMSNSYLLHDYYPVFLWFAYPVGLSTQTCGVYLTVLVSVHRYLGVCHPFRAKRWVSGKPVKWAIIGSIIFSIVINLHTWLELDIRPCYSINFNAPISSIILTSLRQKSSYNLITKCIMYTLIMFIIPFITLIIVNCRIVVALKESTRMRNGQSMKKSTQSRFTWKSLDKRIMNNFRMLKGAKYSELFGRFGRLNFNPLKTPSLLKTNGNSLRDRSVTLMLLAIVAIFLCCNCLAFCNNIYENVQHVKKHASDSQSLNQTSFVPEIEEQSQDYDGEWSIFNEWNFDLSVEISNLLISLNSSSSMFVYLIF…	4
frpr-17 CELE_T14C1.1 T14C1.1	403	MDDSVDIYEQAALNMSIPDGCDVNRVVYASIKQLISHDIIDPSSVGFQNCEPLCGICYHGSKEWDYIRFNIIVIGIILPIVGVFGIVGNAISAFVYSRPEMRCSTNLYLFSLACSDTGVVLTGIFLFSLETFRPFSLTVARISGQLSAIVYPMGMIAQTCSVYFTVCAGVDCFVQVCLPEKVRRAFSRKETVHFLATCVVIFSVLYNVPHFFEGFVIDCYHQELGGMSKEVCPATLRYNEMYQSIYYKYMYAIFLAVGPLFTLIILNTLIIGFSVFGSSASNMDDTMSLILVVLLFICCNTIALVINIFESYLSETLGSKINYIVDLSNFLVVFNSSFNIIIYIKYSRPFADTLFSYFCNRKPITDNDGPGPPMLITEKPSRSKKCKETLSRLLVASQP…	4
frpr-6 CELE_F21C10.12 F21C10.12	349	MQLTGWPEYVSMIYLPIILVGLVGNGLSLYVYTTPNMRKSTVAFLLYSLSICDIFVLLFALPLYSISYLPIWDNVYGAWSMRRMFIAFSTKFFYPLCMTAKTASLYIMVVITVERWIAVCRPLQVHIWCTFKNSVRIVIAIITFSIILNFPKFFEYQIGYSDALGYWPKRGILDAEEHWWYYISYFIIISVIFDYLLPFVIMFIANMKVINELRKSRKERALLTTSLQKEQNTTVMLLVVTILFGFCHFFSMALKLFESIFKDFLNRHNEYFEVMIEVSNILIVIHIGTTFFIYYFFSARFRNILCYLFKKRSNLPDNSLTDLNKRKLLQKSDSICTSLAKTSPKTSMA	4
frpr-7 CELE_F39B3.2 F39B3.2	414	MADATTASPSTTFIAFIFDWALYFIQMLSHLLNGYFTAFFVFTGIILNLLSVSIFLRKERAGTPAIQYYLVTLTLWQTALLANAFLLYSFPNLWWGHLVSQGTYVYLYPYVYTFANTTHTGSVWIVLTLTIDRYLALCQPLKHRAIGKKRRVRRLMIVVSAMAVMFSIPRFFEVHVILICDEDQLSCVATIDRTELFDNRLYWTIYHVILAMVFVTLLPCLILFALTLRITIALRSAIAKRKSLCAPNSDIDTRCKSIKSSRYNSSRKDHKSNIMLVLVIAKFLVSDILPTVIDVLEHVVGQSAFMRSPLASLFVDISNFLIVLNCSSNFWVFFVWGKRFRRSCRKCIKSTLIGACIYDMAQWNNDSEVSLCAPSSFTTGNATKVYGSTERSFRYKRNM…	4
frpr-10 CELE_F57H12.4 F57H12.4	292	MIYPSMHQCSTIHETEQRLNSSVCHFFWRVTVSIFPLSLIAQAGSVWTYVAVTVDRFIAVCFPIKRRVWSTRSNTITVLFVITFISAIFKLPSFFEVRLDHNGEVEPTELRKNEFYIEFYLFYLYVTFIQLIPWTLIIFLNAIIIHKVRLAYRAQEAMVHNSGKLNTKREDAERKVTVMATVMTMIFIICNIPPGINYLVDRYSNPTVYRQRIPLSNVLVCVNSASNMMIYCVFNSRFRRAALKLLGCPSFFSSRHGSVSTRLTREETTGMLRSRVATYENLQRSMEMPAAC	4
npr-22 Y59H11AL.1	434	MDEGGGIGSSLLSRITTTASEIMMRNEPTTTENPAVQEMNHIYHLTPSMKMLCILFYSILCVCCVYGNVLVILVIVYFKRLRTATNILILNLAVADLLISVFCIPFSYWQVLIYDDQRWLFGSMMCSLLAFLQAMAVFLSAWTLVVISFDRWMAIMFLLTPNIRITRRRALYLVAATWIFSILMALPLLFTTRFFEDQDGLPNCGENWTYFGDSGEQVRKVYSSMVLILQYVVPQAVLIITYTHIGIKMWNSRVPGMQNGATKKMIVDRHESVKKLVPMVILISALFALCWLPLLILINVIPEFYPDINSWGYILYLWWFAHGLAMSHSMVNPIIYFIRNARFREGFCFFSSKLLPCISFKELRLLTDNTSRSFRNRSRFSGVINPTSSDEKPATSLTR…	3
npr-40 CELE_Y70D2A.1 Y70D2A.1	439	MAVAHHLCQFLRKNETIDFSTLLSHSPREEATSNINKITYAYIAPFIIIFGIVGDVLTVVTLTHPLLRKSSIIYTYLTLLAMTDLLTQFSVIPMIMWLLDIRACSKSSAFFYAHIGFPLANALMGSSVWIVVFLTLSQYMAVCKPFAYGLRSRKICYVLFALAYMFNFCIYAPWAVKKNVHDISDLVPESFLVSVCPYVVCDAKRPDWFVIYETARELISRIFPFFLVAFLNIKILITYRNTKRDRMERLANSQKKFMFEKSEKEEKRLFILLFAIVIVFFVCTIPAAPLTILVADTKNNNVGFQIFRAVVNLLEFTKFAMNFYFYCLINPDIRSICAHVITCKKITKPARVKGQPTTPLSKYTRSTKNSTIRDANKNGEKRGIDGNDNDSKKFDDSRN…	3
frpr-21 CELE_E04D5.2 E04D5.2	433	MDQITSTMMLDLMEEEEEEICGLYEGYSTQRFVIISGCTTVALFGVLANMLLMAVFRRSLPSSIFLATLATCDMLICLTYTLLFGVDAGIWYRKNTTLFFLYHRYIVPVFFIAKVVQFAIPFILILITFERYLWTCTERKRKAFSAIFNERGRIVTVIFVCFFSVAIRIPVLYAMKVKTFPLCDDYFRSESLDGTPFAATEAYEIYDFHVITAIQMMFPFVVLLLLNLTIIKRLVAEKRENMYPILRGAGTTTEVKKASFVQGNLPENYVLLQVAADVIKESLIHSSAAVSSEIVENQNVDDITDSVDVELPRHRPSIFNTFVLALRESSRSKRSQLRNAIYTMLAIVTSYLVCNGVHLFLTILERFDPSYLYESTDRMQSSTFYIVLSDTVSICYMAS…	3
frpr-16 CELE_R12C12.3 R12C12.3	340	MNRYEFYELKSWMYLPVIFIGLLGNFASFLVYRTAPMRKSTVGTLLLILSLIDILLLILITPIFVLVFLPLWQDQWQKYSFHMSFFAYSTRYVYPLCMMTKSCSLYLMVLITIERWIAVCRPLQAKVLCTNRNTMKAGIFIIIFSIVFNFPRFFDYKIGDGYLSEMWMLDTEKHWWYFMFYFIILSVIFDYFLPFLIMTIANYHVIRALQESDEVITGLAVQKRKDQKTTVMLLVVTIFFAFCHLFSMFLKVAESIFGGFLTQTSFYWEVFAEFTIFLIIFHTSSTFFIYYGFSEKFRTIFHDIIRCRQRLDDVKCSTYLPVNSSGAVSESKTRKAPAIV	3
npr-9 ZK455.3	431	MEFENLTKEEMEQLQKIYDDTISFERKIGIIIPTIFAVIILVGLVGNALVVIVAFGRQMRNSTNTLIIGLAISDLMFLLLCVPFTAVDYAAPTWIFPEWTCSMINFFQHTSAYCSVWTLTLMALDRYLAVVYPVESMTLRTPRNTVIALCFIYIIIIASQIPVGRMHGIYVYDFIMEKRSTCAILTIATAEATPTMARTYFMTFNVFGYVLPLGISVVLYGLMLRKLWDMPRPGNSQSVGGRNLTNRDSGSSIRRRPEATAAKRKVTRLVLCVLITWALCWLPLNVCFFMSGLAYPEPLVISHGVIMVIVQIASQVLAYTNSCLNPILYALMSQSFREGFIRVMKMLINKLSRGRFCTNYRRSALRTELTHYNQTPAHPANTVVQVSNGERSSLLKDNS…	2
npr-6 CELE_F41E7.3 F41E7.3	402	MSNDLVPSVSSILNETTPSYQSTCKIKNNPMEMEYFRPFFISMYCAVFLVASSGNFLVVYVVMTNKRMQTITNIFITNLAVSDIMVNFTSLWLTPTYTSIGHWIFGGGLCHGLPLFQGTSIFISTWTLTAIAIDRYIVIVHNSSNININDRMSMRSCLSFIVLIWLCSLLLVTPYAINMKLNYIHEPCDFLICSEDWSNAEFRSIFGIVVMILQFILPFVLIAISYIKIWLFLNSRQSMTERKSDIKRKKRLLRMLIVMVVIFAICWFPFNLLNCLRDLKLDNFMRGYFSFVFLSVHLMSMTATAWNPILYAFMNETFREEFAKVVPCLFARRPGTGPIRVITERTAMITNPFRRANRKKKVEEQPVTVISESPLQTAVEPQRSIVYLDEPENGSSCQT…	2
npr-26 CELE_T02D1.6 T02D1.6	461	MSEISLNETLQRTPPPQQPLQQKSLFLKMDASTEFEIYREHYSRVMASINATMCQEQPDGILYCPNHTGGPVWVRNVYPPIQELQPKVLIVVVVFVLCFIVGVCGNSSIITIIRGVVEDRRKRMKRHGDNAILYIGALCVCDFVMSLSLPPAILDSVIGFWIFGTTMCKVHHVFGSVGRIASTFLITAMSFDRYVAVCYPHHHRLRSRTFVISTIACLSSIAFVLLLPMLTYASAKEMVLHELKAHESANITRVRVFKCSDMMPGPIFYWFTSTTFILGYVVPLILIVYFNLKLINKLYAHKRVLPRSAIPVRRVVVYTVLIAAVYFVCWTPYWFSVLYAIIMSLLGKPTTNSEWVLFAIYCVHLLPYFGSSSNWILYGLLNTQLQMKNDIGDDGQSIM…	2
npr-33 CELE_F31B9.1 F31B9.1	399	MIDPNNMTTVIEKTTEIVNSVLTSNESDGVLEQTSTLISVLATQSAPLQCFSCHPKLYFIVFGLVFMIIICAGVIGNIFIVFVILMDRKLMSSSVNQFLLNLAIADLGNLIFCSPDAILVLIDRGWLLPNFACHLLRFLQEYFLYASVLLQMAIGVERFLAICSPMRMQRFSTKTTISVLAGVWCVAACFASPYFLYQGIVFHKLYFCFWKGISHKTRTYFKYCELIVLYAIPLVFLTTLYSIMCRVLWGNEDNHNIANHSQQEAILKLRRSVVKMLIISMLLYFLCYTPIQVLFMLEKILDHSVQLPQWLRLLLNVLSVMSSSTNPIVYIICCRHFRLRLRDVAAGISSFCCWLLPSFSKSEYECVDESMTAKLSRSPYVSFRSSRRQNSRANLSTLL	2
npr-37 CELE_M04G7.3 M04G7.3	479	MRDRFSIGQAIANAIAKRQMQTSEVENIFNRCKSIECVYREVMETDYEGGMPNCSYRYPFPPEEDTISAYALLIDGPCTCVAALLSMIGARYAIKFLCRAGLNKELTAALFALCAIDSLLLLTVFLFYGIEAMSLLFFRTNIMYDKQDFTYNLHGIASSLTTASTALVIYITFLRFMVVVQPMRFATSMNSNHRRTGSKAVRKGSAQLEDSVTNNTIFSRGTFNSSSIKRHYNIRELIRPFYIPFLLILISFSVNIPIFFEFTTTKCFNVEHNVEATNPEPTVFRSSFAKYKAVLMTLTQTIGPVSIILVLSIFTEYKVHVSLKARRKLFESQQRSRSVVLSEELKETVSRTVAVFIAVKFLIFRTMPIFFDVYENLYGIDEWGTVMSIMVRVSDFGIV…	2
frpr-3 C26F1.6 CELE_C26F1.6	360	MLLLLSRVLVNVMVLMCFGGILTNFISFYIYTRKTFRKKSINVLLAALSMSDLCVCVLAIPVFASTQLQQVIPPTITAMIMVYLYPVTIMFQSVSVWLLVSITIDRYLAVCHPFMVNTYCTRNRALITVGVVVIFSVAYNLIRIWEYTINFDVAPENRTIEDLVVPKLRANPHFLLWYQNVATLVSQFAFPLTVLCVLNIQVARTIIEASEQRRELVASVKREHSTAKMMIMVVLVFLVCYIFSFILNIWEILDKETFGGDIGWFMNDINNVLIVVNSTSAIVFYYKYSTRFRNQARTLPGIRWYASMSKFNVYDTEATSNRTMVTRYKESMISIRGTSTRLSSSHNLLYKPSYSKPCDI	2
npr-15 T27D1.3	345	MSVAVGIPYVCFFIILSVVGIIGNVIVIYAIAGDRNMRKSVMNILLLNLAVADLANLIFTIPEWIPPVFFGSTDWLFPSFLCPVCRYLECVFLFASISTQMIVCIERYIAIVLPMQARQLCSRRNVLITVLVDWIFVACFASPYAVWHSVKTKDRNTNSLRFKLFQLSATCSNTVGKSTWWQGYKLTEFLAFYFVPCFIITVVYTKVAKCLWCKDPTLQCETRSCLDNKSSSRSSDALRTRRNVVKMLIACVAVYFVCYSPIQVIFLSKAVLNVTIHPPYDFILLMNALAMTCSASNPLLYTLFSQKFRRRLRDVLYCPSDVENETKTYYSINNTSIVGPRASFN	1
npr-4 C16D6.2 CELE_C16D6.2	490	MLLEIGTITIGNITRARKFGERMNGSDCLNLNSELWLYREDLSSRWYIMLVFAFLYLIIIAAGIIGNSCVILAITRNKSLQTVPNLFILSLSCSDIVVCCTSATITPITAFKKEWIFGEALCRIAPFIAGISLCFSTFTLTAISIDRYILIRFPMRKPITHYQAVGVIAIICAFAATITSPIMFKQKLGEFENFCGQYCTENWGANESQRKIYGAALMFLQLVIPLTIIIISYTAISLKIGQSMILKGAKKQKTDNWEMELSDQQRIAVKRRQRTNRMLIGMVVAFACSWIWSVTFNILRDYEYLPELIKTQEYIFGIATHCIAMTSTVWNPLLYAVLNLQLRAAFIDLMPHWLRRHLNLEGDNSSPLLNHPTMTITNKYGSTATKTVKATYINTSNGQ…	1
npr-3 C10C6.2 CELE_C10C6.2	376	MEGGRNCVMTVQQWQPEYNDMNQIRAIFSLLYLLVWVGAIVGNTLVLYVLTFNQVSLSVRTVFVGCLAGSDLLMCLFSLPITAISIFSRVWVFPAIFCKLIGVFQGGTIFVSSFTLTVIALDRCVLILRPNQEIVNFPRAVFIVFCIWLLGYSLALPVGIYSDIAVYDEICGTFCEENWPDFNPDTGRSGIRRAYGLSVLVLQFGIPALISSICYWMISRVMSDQLARRRGHNIRPESETKLVNRKTRANRMMIVMVVGFVLAWMPFNAVNLYRDLFGISKWYSTVFALCHVCAMCSAVLNPIIYSWFNPQFRQSITTLFKGTDEARLIKKKPQSTSKMVSYPTNFSEIRKETEIASTKTKITIAENDYRAGDQLL	1
npr-29 ZC84.4	395	MDFTENEEEYEHWTHIERRVPFQGYRTYVASTYISFNVVGFVINAWVLYVVAPLLFAPAIKVPKSILFYIFALCVGDLMTMIAMLLLVIELVFGTWQFSSMVCTSYLIFDSMNKFMAPMIVFLISRTCYSTVCLDKTRGEKAATLKYAIIQFCIAFAFVMILLWPVFAYSQVFTFYMNPNSTAQEVTVMRKCGFFPPPQIEFWFNLIACITSYAVPLFGIIYWYVSVPFFLKRRALTTLVASSSMDAALRKVITTVLLLTVIYVLCWTPYWVSMFANRIWIMEKKSIIIISYFIHLLPYISCVAYPLIFTLLNRGIRSAHAKIVADQRRRFRSLTDEASSQIRTAIRTIPGTKMKKNEFLTRTEEISSDKIASEAVSEFREGLPSQTSFPDETLL	1
npr-13 CELE_ZC412.1 ZC412.1	450	MGDAESHHCIDVNAILQQFNDWTVLFEVRLGYSVLYFLILIIGLVGNGLLITSILMRKKLSVANIFLINLAVSDLLLCITAVPITPVLAFMKRWIFGIIMCKLVPTCQAFSVLISSWSLCYIAIDRYRSIVTPLREPWSDRHARWLLMFTWVVAFLASYPLYYSQNLKTMVIENVTLCGDFCGEFNWQSDEISKLTYTTSLLIIQLIIPAIIMSFCYLMILQKVQTDWLVDEGSMLTAAQQAQTAVRKRRVMYVLILMVIVFMACWFPLSAVNLFRDLGMRFEFCQTVYKVLMMDQMYFKLLNVHVIAMTSIVWNPVLYFWMSKRHRRALKDDMTWLTNARRHTNVGVLSRFTPSPSVSVVYRRTLERHLGVNHFRRGTLADPTCTSRERSLPRELQSN…	1
npr-16 CELE_F56B6.5 F56B6.5	436	MINDTYSKHAMSDSSQHLRLALTVTHLLLVALGSVNLIIILLIITRPYLRSITNVYMIGLCLADFIYLADLILVAATSLNGKSWPFGPTICHLFHGTEATGKYASVLFVVLLAADRYIAMCKSDLCGRYRTYRTAIFLSGLAWIAAFICSLPLYVYADEIKVRMRPKNGTDSIENNHTLCIAHWPSPPHAQWYISVCSVMIFILPGLVIFYCYYHVFCKLREAAKGSRRLHRNKRSRSSYQRVTRSVQRVVLFHLLCWSPFWLFNLFSAIFRVRITTQLMRIIVNIIHLFPYVNCALNPVLYAYRAENFRTAFKSLLFWSRRSVSSKLNRPLPLPEDVRSTSASTYYRNSSNLDCLKSSLPIKSTMEPASVYQPEEESPVDSTENLEMERKKAELQAWR…	1
npr-32 CELE_Y116A8B.5 Y116A8B.5	440	MNISTIISTTTTPPAVSNEDDTSRTTLKLVLAISYLVLFIIGTVGNGTVILMIINILTSMKRNVQAGKRMMSSTNHVFIYVLGLSIVDLLVILHLPFLVVDLLKGQWLFGVAMCKVYWFGESVNKLLSSFLMTVLSWDRYMAVCSPVKSMKMRSNATALKVLLACTIFATVLLLPVLYEAAVFKIDKMRMVPLLEGTEELAASDLAGTTMSKCMFDADATFTLYTFVIGFAAPAFLIIIFYVQVIYALQKSSRNIRGARGISKPDGSSNRVKKVTKRIVAVILFYFLCWTPQWTLNIMSQFNLIAVSWMTPALSAMFFVAHLLVCFNSAANPVLYAYINRELRSQHVMAMHRKRHSLGHEQQQRLNQARLSMQSRPSDASATVFSKLGDSDAGIFNRLS…	1
npr-27 CELE_F42C5.2 F42C5.2	366	MEDFSSNFTTTSIQNDSYEEDQQPHIDMSFAKGFMTVVYIVVCLVGTPGNLWIIYKLFRAKLWSGASVQLTVSQRSRIYIFALACSDMFLLLTLPATASYNYHGTWIFGSAACYIIRSIEIFAKLFSVVLLTVMSLERYIIVCTRLRHIYRAWMSLVPLAVGTIFGVLVPTIIHYFYLQHFSVPFDPDVTWVCLPLMSNEVFNLFAQYTFVVGFIIPFAIMTACYIMLVRHVRTKYKMRRAQTTTTLAKPGKEPRYMSEVKKSIWRIAVFHFVCWAPFWGFTMLPNYIYQIDQFLHGDNEEESGGESIFLVYCRLVSNCLPYINAAGNWVLYALLNVDVRKHIYNQPKKKRKFTLKFNPVNTSSNC	1
npr-28 CELE_F55E10.7 F55E10.7	518	MSTMTISSTSILTTVSTTTSSTIVPSLNDPMEIQFEIMFVMVLYSCLAVTGVGGNCWVLIKVIKQLSGCSSNRSRPYKTVVQSSAYVYLIILSVVDLFSLIPVPMIVTDVYVNHFPFGLWACKLSYFCEAINKSLSPMVLTALSVDRYIAVCHPTLYWLRTTKFSLGVLAVCFSVSLIFIIPVTKKATMQVMKDNTDEEIIKCAFDHGDSASYVFDTAQAIVCYLVPLFIICAVYLAILHKLFIHTRFSTVGKKTSISLGRVVKCSVMVVAFYFICWTPYWTMRIHYLVTRFIETNSDGNSTVIDEVVAAVAEEVQDGIETSYFFGLISKKRMHNIEIALIYILHSLTYAQSAFNWLFYSFLNRNLRSNNGRGNGTRSAANTSVFDNGNATSTVNTSLT…	1
frpr-18 T19F4.1	432	MESQQLMACAILVIVLVGIFGNSLSFILFSRPHMRSSSVNVLLCALSFFDFSLLTLSIPIFVIPNLDLWANDLSLSTYMAYILKLIYPINLMMQTCSVYIMVMITLERWVAVCRPLQVRVWCTPRKSRNAILVIIVSAFLYNFVRFFEYRFVVTESGALYEKWLRDPGKHRWYYVGYYTILYIVTHFLVPFSVMAFANGHVIVAMCKLSKTRQMLTRQQQREQSTTVMLLIVTFVFAICNTLPFLLNVSESIFPTLFQDESTRGLAYWLNDLSNLLVVLNSGTTFIIYFTFSEKYRQTLVFILKNGCCATVSDYNNYTAMSRTASMRISSETGGQIQRQGSKMSNSSRSSDVLLKPIYMQKRSERFSSEYNERTCKHLAPFEEHKLPKLPSEKRKKKLH…	1
frpr-19 CELE_Y41D4A.8 Y41D4A.8	390	MTTDANFTGDPSPLVSVLGLIKSPDLMIGSTEVPLFEEEDMCTPLNISCACHTDYSSYEGLERVFLGLVAVPVIMFGILANVTSMRIFTHRIMSGSSINWYLAVLSASDTLILFSAFFVLSLPRFGEYLTWWRANYISYSVTPCMYGLMMTAQTCSVFMTVGVSVHRYIGVCHPYKSVEWLPKKRVTTFIIGLLTFSVIFNTTRFFEVHISNVCYRENIDYYMPSLQPTALRMNDLYRQIFFGWAYTIVMYVVPFTLLIALNSMVLSAVRRSRRMHMVSQCGAESEEFSKKAERKERQTSIMLISIVLLFIACNTLAFVCNIMENMGTEGAIYQTLVTFNNLLVIINASCNICVYMLFSGKYRMLLRYYLFCDWSRQGELLIDRLEKSQT	1
npr-18 C43C3.2	476	MSSFYNEAKFLISDGEQMRIDTYAVGRKTMQQSDAFKGTFYENFTLVYALPLSNHDNSSLMLIAGFYALLFMFGTCGNAAILAVVHHVKGQDPRSRHNTTLTYICILSIVDFLSMLPIPMTIIDQILGFWMFDTFACKLFRLLEHIGKIFSTFILVAFSIDRYCAVCHPLQVRVRNQRTVFVFLGIMFFVTCVMLSPILLYAHSKELVMHEKVDLDQEVITRMHLYKCVDDLGRELFVVFTLYSFVLAYLMPLLFMIYFYYEMLIRLFKQANVIKQTLVGRRSGGEEKKLTIPVGHIAIYTLAICSFHFICWTPYWISILYSLYEELYQDTKSTASPPTYAFIYFMYGVHALPYINSASNFILYGLLNRQLHNAPERKYTRNGVGGRQMSHALTTNTRP…	0
npr-11 C25G6.5	402	MGSVNESCDNYVEIFNKINYFFRDDQVINGTEYSPKEFGYFITFAYMLIILFGAIGNFLTIIVVILNPAMRTTRNFFILNLALSDFFVCIVTAPTTLYTVLYMFWPFSRTLCKIAGSLQGFNIFLSTFSIASIAVDRYVLIIFPTKRERQQNLSFCFFIMIWVISLILAVPLLQASDLTPVFVEPSCDLALYICHEQNEIWEKMIISKGTYTLAVLITQYAFPLFSLVFAYSRIAHRMKLRFANRNQNVTTNTNTSQRRRSVVERQRRTHLLLVCVVAVFAVAWLPLNVFHIFNTFELVNSFSVTTFSICHCLAMCSACLNPLIYAFFNHNFRIEFMHLFDRVGLRSLRVVIFGEQESLKKSMRTEFRSRGGCKTVTTAEPATFQRMNESMILSAMEQD…	0
npr-34 CELE_Y54E2A.1 Y54E2A.1	613	MSEDGDDPSCYMVQETTFDYEYDETFDWSNMTAMDCNCTHPLHKYLEVCISRCTVPDDTVFFSMTDEELFEIALPGFLYLTVFLVGTIGNSMVIFVVNRFKRMRNVTNIFLASLSTADLCLIWFCVPIMFMKYMSHTWSMGRFACYSVHYIQQFTCFCSVLTMTMISFERFLAIAYPMRNIWFSSIGRAKKVILLIWMSSAVLAVPTAVRMDYETNLSLSGQRVHWCRRRFPAQFLGYPRTSLNKAYAMYQLLLLIIFPVLTMSICYARVSAIVYKSSKDRVILSQAMVAFSKAATDAVTFSGYSAIPMITTSRNLKTANTTIKSYSNHRNNRVAEANKKQIVQMLISIVCMYTVCWLPTIVDELLTSFGYICRTSNTQTLKHMRMGFNALTYCQSCIN…	0
npr-31 CELE_T07F8.2 T07F8.2	408	MMSPYFAGFLYIATVLTGLFGNIWVVCSVARSRKPKSLMSRSSPSDRLRAYISVLAVIDLTVLMALLVRALYHFLPHFMLDSNSCRAMFVLENSVKITSLTVLSCISIERYITIRKPFCSEVRRQFVNATPIGASIFVGLVVGAIIVQINSVTVSSDGLNCVRSYRGKAIPRVASYLTAVAFLVDLTIISLNYSQIVRHVRRKFTKRRARVQANSRVRESLVNEPRYMREMTAAIVRVGVFHVVCWLPMSLMQFIPDNTIQSELTAGIRLFSNFRDYSITRWLIFIATWLTSMNAAGDWIFYAVMNRDLRNLIRFATERRKRSTMSHAASPSTNRSLRQQVPPSMKVLHSISYRSSIGGSMDDAAGASFLQSSPKESTVSQEPNSPYGVRAKISILTRK…	0
npr-38 CELE_T10E10.3 T10E10.3	385	MFPFLAILGVFGNSITLFVLLSRSMRNSTNEMLAAAAFSDILYIICMVPNQLSRWPSMVLSDCPDNPERKCASEYHMWFAVHKHHLAFLANWFSAASTWFIVTVSFDRLYAIKAPFSARLQTICPRHNLVAIPLILFFTGASCFHMNFKLLDDHAGSGNFTNSTMENIEDNRITLIQVMTVFMFIFHILIPMILLISFHTCLLYYLRNRFRHFFPARTRSARNSTRSDDVPAPLLSNVTDRSEVVRHHSSNSGVWNRHVNKAERHVTYTVIAIVTCYIVSHIPSACLYVYINLFHNVLYSTRWMYTSVQVSTTVVTCSKVANFILFCMSSKHFRKEMKKKLCFLSCKYKDGISGKDSANQPRTRFRFRSLPLNIIGDSSNNCSHD	0
npr-20 CELE_T07D4.1 T07D4.1	410	MLNDTFRIISNATLDDDPCSVSFIDQPFVKIPVMIIYCLVFVVCLSGNFLTLIVMTSHPMMRTPTNFFLSNLAIADLLVAIFCILQNMIHIVGFDHGNWPLGPVMCKLYLGLTNIMPCTSAGILVLVSLEKYIAVLHPLSGLKLLTPEHRWVATMIVWVISILVNFPYFLYAQNYTYLGVSACFRGSMPIWNSFSFIVWYLIPLTALVFIYSRISHLLWTSDSNRQSSRQSHESNGSLERGNGYANTAQPGSSWQMKNGRIVVYKQESLLNVPKREKKVKEPKRPKDTEGRRKVVRLLVAVVVSFALLTFPHHARLLYTSFQTGTICNSNWTMIFQPLSYIFLFISSAINPILYACLSKRFRNALSDVIHCRKGVFSRISRSRNRTLVSDVPPEDSRCP…	0
npr-8 C56G3.1 CELE_C56G3.1	510	MDFINELFFTDTDIEDLGMIMEVKDIDNYCDRGISPNASNYLTYPFDGLCLQKFFYQLQTSLRRFTPYEEIIYTTVYIIISVAAVIGNGLVIMAVVRKKTMRTNRNVLILNLALSNLILAITNIPFLWLPSIDFEFPYSRFFCKFANVLPGSNIYCSTLTISVMAIDRYYSVKKLKIASNRKQCFHAVLVSLAIWIVSFILSLPLLLYYETSMLYVMREIRVVDQSGQEVIRSYGWRQCRLVSAGRLPDITQSIQLLMSILQVAFLYIVPLFVLSIFNVKLTRFLKTNANKMSKTRAPPKRFDRSDSHHNSLKNNNNHTSSLRSPSMPSIRSSITERNKTNQRTNRTTSLLIAMAGSYAALWFPFTLITFLIDFELIINQDYVNLVERIDQTCKMVSML…	0
npr-21 CELE_T23C6.5 T23C6.5	362	MESDSPLNHPVVHFLLCVSYLFVFLATIIGNLIILLVFFSQKRVRSVPNFFLANLTVADLFVGIFCVLQNAVNFVFQGHGRWPFGKVLCYSYIYVLHFIPNVSAGILVLVSVERLIAVLRPLRVRRAFSQKVLITSSAVVWLTSAVMNTPYVVASQFLEISDGNETYTICTRRHVEIYGFNLLKLVATINFIVWYAVPLVILLCIYATIGLVVSKAATITKHSANKLLPRSSWRSEASTGGVSVEKRRKVGRLAVGIVVAFAFFSLPRYVYFMWTVWRDPMAPRCLNCLQSVLQPISFLLLFFNAAVDPFLYAFLSTRFRQSIKETFHLGKVRESNIEQSSRVRRKVLNSELETGYEYHNHS	0
npr-25 CELE_T02E9.1 T02E9.1	376	MNITNSSIGYPPPPLVGASFAKTAIPYSICFVFGTLGNTAVLSYVFFITRSLKSSVTALGNTFIYIVALCAVDLLVTVSIPFSLSYMILNNWVFGELVCKIHFMLELSNKMCSTFILTALAFDRYMAICHPEIKRIHEMRHTIYITTILATLSLFLISPVVLSARVTSFKSGQYFVSAKNERHEVIRQMCIDGMALEWKVWVSAFLIFFAFLLPCTLLTYFYAKIVLRLRRQRRTMLQSRIPLRRITIYTMAATFFYLSCHIPFWLPQIYNIFSTVLGHKMNPKVMTFTYYSHLLPFISAAFNWIFYARLNSQFKKGLVLVTERMIRKRTKSMHEKGYSEAAVELTSKFDDVPLMCPHCEAQLSIRSSSNGKKNSR	0
npr-30 CELE_H10E21.2 H10E21.2	396	MAQRKRSQMTTDIISVAQHVITTSYITVILFGNIGNVWVSWKVGIVFVFDKSSLVPRNIVMLILFICVADLLVLLHLTLFVHFQFEKQWIFGNIVCKSFYCIEVVNKLIIPLALLRISRESYESVRMTSHKCSKKRRSIWNIVFQLYSVMALIAVGVLTISVLIFAETRTYEIPRHGELTAVTMCIFHPPHPYAMVFNILAFVFGYGFTSAAYMYFYLRVPMILKRRYSSIKTTSSNSTRFNHQSILKIRHTVNAFVVVYMACWTPYWALFWLFFTFPPSNNWMVIISQMAHLLPYISCAAYPIILTFINKGIRNAHSTIMTSQRKKLMTIRAGAYQMITAQLGFVQTWLRDDNTLAPTLIRPRWSSSGSVVPTEIHVESVVEDEETEPAAPQIYL	0
npr-19 C02H7.2 CELE_C02H7.2	420	MQTDDSWKHNVSFYTLQALFTSANRRDDFIAVSIWTIMLLYALISNMLILAGIARSSTMRSATSYWFIISIAICDILMTFISLGHLVPATAFHEEYVQFKSIRNIVMIFFYDLFWYTGVVQLGLMAGNRFVSIVYPMEYKHIFSRTRSLYLILFGYFLGFLVSLPTLFDCCHTLWDSNYYITVYEKPDTLYKYVDMAVNSISLCMMIISYAVIILKVRASGRAMAKYQLTIRTRQQNALVNGVSLSCQMSECGRTSSVRPPRSQVSKKEMRLFIQFFVVSLVFLLTWTTWQWLPYMSESKWAYFVMTSLFFINNSVNPTVYIIFNTQLRRELHYLICRHHVITTAQNKRKQTLFGRGIAAANKIETDFQNNTRDDATKSLVDQAGSLSSQSHGTIDEHV…	0
npr-36 CELE_F10D7.1 F10D7.1	435	MDNSTMSAYEEALARYDNNLINFSAVTMTIFSITALLVNVYLLNCARYLRRPVSVNLRLCVFLLACDALCSLCYIFTYLINIFFSHFSNCASLLLEVIKMSTFTASVVTLSALAFNHYVGIVYPLHRNAITPRIVKLTVILAYAIPMSIYLAIFTIFPGGLRAPIAFAFFNREGCMGNAIYRNNFFRASLVCPFIFFIFMLSFLYMHIVIHMRKISRDPLLNNKNNRRNNRKLLITILLLAGSACAGWLPTSLNFLLPLVITMPTRGRLYLGILAQFLHVVKLLADAFIYARRLIEIKYAIFVFNQKTKHQILRKLRIRHANEKEQTYVPPEFQRYLIETKENRSVRSKRVKSEFQSTDKKRAGSEKQKRPATKVTSCRTSPNGSKHLSVHSPLKTCKS…	0
npr-35 C50F7.1 CELE_C50F7.1	381	MNTSFVEPLYADVEQLEPVPLLRHSYQLTVLYTVAYGAVFFTGVLGNTFVVLAVWAHKNLNITTDYLILSLALADLFILWICLPTTLINSIFTEWLWGQFFCRLSTWANASTSFASVYTLVAVTADRYLAICHTLKYNTSWDREYTKYVIFAVWLVAAIFGIPNWYNYDLIVWQEGSYGYRLCTSQTDQKLYFLFVNLLLAFIVPFGLISGLYTRIFITVSTHRSLAVDARAREDRVKLRVATMMLTVIIVFACCWLPLYCIFTYFFFFADQRSDLFQITSMLIRPIFQWMSLLSSSLNPIIYIAYSHKYRRAFKSILLMPCKTRYERVRSTILRRHSRGFKSTATISMSNFGTEPTNLGGASSLLIELDGKQVERSTSDC	0
npr-23 CELE_Y34D9A.2 Y34D9A.2	326	MYGFFNSSEIDEEYYNSTHTSAPSPILALIFTIICIIGVIGNASLLVYIFAKKLYQNFISSRFIGHLCFTNLIALLVLVPVIIHNVFTGVNLLQDSNMLCRIQVSITVTVWTVIAMMNLCIAGVHLLTFARIHYEQLFGLTPTKLCILSWIISWLLSLPSLTNGHVAIYGPAVRTCVFSHSDSGLKFLTYTMIFGVFIPALFSSIAYFRILQTLFHSPIVFQSLGLYKSRFLVYFFLLGPLYALPFYILTALDPSDPVRMSQDTLWTIGCTMFAFVPCIIAPLLYGASIFIIKEEDMALTARTHTKTGTGAYHHVAHQHNMQAQLI	0
npr-14 CELE_W05B5.2 W05B5.2	425	MLDYNNVTSGSSEEDYDTSEIIGLQVNTHEEYEDIIAEALWPNAVEQWFVYILASMMVIGVIGNTLVVVVVATNKSMRNALNLVLMNLAIADLLILLFCLPLTVVNDVTKTFWFSAVFCKSVNFVNNTSVYVSIMSLVFITCERWRAITYPLKSPFVRTRSVIGGIWFIAMFLSSPEPVTLHLAGAPFVRPNFTTKWGTRCKESWSEEFQKNYQLLQTIFSFVLPLLVISILCLHMVRTLHFSANYLTVANRQISIRKKAVRMLCAVVFLFSMSNLPVHLYNIALNYDLLSTDVSTNTIAVRKLLPRVFSYSSSCLNPILYSFLSGRFREEFGRVVCCLRDEKSSREFRRKQASLYASSQRVRTNSCSTMLLDRETRSSLIIRRVSLAQAIPSSPLIAH…	0
npr-43 CELE_F56A12.2 F56A12.2	413	MNETDDNWTVFTKLYSCQYRASDDSPQFTLWLDGPVTISAAIFSAIGTVYAIGFLRNGHLNRRMSAALYTLCLMDFMLTMTTVLFLSIEPLSILLFRTNIFYQHQDMILILYGIRNSFAMSSPMLVCYITYIRYRVVNNPLKFASHYGRSRKSISASKMSTAAQPSSTESAKFTISFPAEMFYEFHTRSNAGKRGANFRRFFRPFLVPILLVILCFVIHSTSYFEFNLITCFDEVHQTESKMLQMTQLRGDSYWYFQFKVALTMTTETLGPMLFISTLSLFTEYKMHQNVKERRRLFESQKRSRNTLVTEELKDKASKALAVFIVVKFLILRSLPTLIDLYEVLIENSINFGPFMTKVTRISDFLVILNSATNTLAYFGKVRFEKCFRWLERRIRCRIV…	0
npr-12 CELE_T22D1.12 T22D1.12	397	MTVHKTMQPPNSTGQWTEIHCDWFAEMQNYQNSLYKINFDGSPIVPMYGLVCSFGALANFIVLLAFVRTANLRNLRNSFIVNLAFSDLILCVVTAPVTLYTSLNLFWPFGDWSCKFLAGVQAVNTFVSSLTLAFIAMDRVLLTLCPVRWRLAATAPLLCYGVVWIISIIVALPYALAVSSKLAPFDPWSDRATPKMLTYCNRQVPEICAEMQEAWDNAIVSKTTYTFVVLGIQYILPLAALAYAYFQIGSTIQKRSKVSRTVDTTRRMQMQNRNRRALLLLFLLVLTYAVCWAPMNIYHVLNGLEIINYSQNMYIFCHLVGISSTCVNPIVYALVNESFRNALQSMILQFRPCYVTTTGTAATNVYAYSATSKAENVTLMRDPFSTTPRPNERPDSV	0
frpr-5 C56A3.3 CELE_C56A3.3	493	MNRTATILEGMIPLIPDIMILEWEGSENSTECLCSDIQRDDYSPFFEWANYLTIILALPVLSVFGVLTNIINVFLYTRKRLQNSANTYLLFLACSDFMVIVTGLFIFWIDSARSYIPELTQAPYTTVYTLPFGYMAQTCSIYFTVAAAVDCFVNVCWAKQAKHYCTVRRAKQICISIVVVSIMYNSLRFPQFNLRKCFNDITKEQVIEICPTSLFVTINSVYNIYMYMVLMTLLPFFFLLCINAIIVKRQSKAKTDESAPKNEGTSDDTITMIMVVILFLACNTLALVVNFIENFTEPSPVLLNFLSDTSNFLVVFNSSVNCIIYFIFNTDYRDVFLIYWKKLKRVLIEEYCCCCVPAGSRNYSAYQPVSTRLVIEKSQNGSSSTKLILPSLDLNRSDQ…	0
frpr-8 CELE_F53A9.5 F53A9.5	434	MNSTVISLLNNSTLVTTDQPGFSGSTKGTCSYPTNFAEVDYISTYIYLLAIPTICVLGAGAAVMCIVVFTRKQMRSSLNVYLAGLSVFDLILLSFSALIFSPLQGCVLQGHGDTAVCHFFWRSTPWTLPISNIAQCGSVWTCVAVTVDRFLAVNYPLHSKIWCTPRRATTILIAITVFSILFKAPMFFELTNDDCGRLRTSFLRDNKYYKEYYVTFGYLIALLLIPWTVMIILNVFVVKAVHKAYKIRRSMQGGKNNQEEKDRRCTLMAIAMVLTFLIFNVVAAVNNLAETVFEVSLGFWSPIGNLLICLNSASNIVIYSLFGARFRQMCVLMLCGRQSRWMEWLKVGRYPPQSMVSDWDGRDGTTRKTSLDASTALLSARRMTISNFITYPVSSRRWS…	0
frpr-11 CELE_K06C4.8 K06C4.8	370	MPLYHYGETHFKLEHMSLNTTASSSLNSHSYDMVEVFAMIMLPLILIGIFGNIISIYVYSRHHMNKNTIGFLLLSLSTIDLIVLITAMPSFGTYKFPFFPGYHEIGSVHTIFSAFCLIYFYPLMCMGKMMGQYIIVLISVERWFAVCRPLQVQIWCTQKNTIRAMTCIIAISILFNAPRFFEFKANLITGVIGFGLAHISKNEWYFYLYYGIRAIIFDALIPFSIIAVTNIQVIQQLRKSNEERKLMTTQQQKDNKTTTMLLVMIFMYAICHFLCTSVKFINLFSHNYVQFQFVIFKIIHHISNVLLVFYSASTFFIYLIFSEKYRNVLSTCVTCRNTDELTVSSRGRQNTKTTRSNSQNGYTAIKNEKT	0
frpr-12 CELE_K06C4.9 K06C4.9	388	MMVSSVSNSRNSISTTPPIIDYYGRTRFELEYMLPNSTDFPTSNVQSYTLNEVFSMVMLPIILIGLLGNTVSIYVYSRNHMKKNTIGFLLLSLSTIDLIVLVTALPTFGTYKFPFFPGYNKIGSAHTIFSAFCLVYIYPFGCMAKMIGQYIIVLIAVERWFAVCRPLQVQVWCTQKNTIRAMLYIIAISISFNAPRFLEFTADLSTGVVNMGLSHSANNTWYFYLYYGIRSIFFDALIPFAIISVTNIQVIQQLHKSNEERKLLTTQQQKEKRTTTMLLVMVILYATCHFFNTTLKFINMVSKTYAQFRFPVIRVIHHISNLLLVIYSASTVFIYLIFSTKYRKVLSTCVTCGSTEELNTVSSRGKQKTTAFQIKSTSHNGYTSIKSI	0
frpr-13 CELE_K06C4.17 K06C4.17	365	MTSEPDLHFQDLYDKIDPPFQNATPFARTGQFYENRSITDFNNTTQMIDQCPFKFSQHLALATIPLFIVGLILTGISIYVYTRPYQLKTTVGFLLAWLSVFEWLFLLASFQVFSISETAFFACPTTENEYPKIKAYSEIYIFPLTHATKYMCVCISIIISIQQWIAVFLPMEAKDLCNMERTKRFLVGSLVISSILSLPKFFEKGIHEINGWPWQTNAVEKYTFLKVVQYVEENVFSVFKIFFLLFIINVSIILLLKYSHNERIRMTSQSIRDPRTSIMLLAVLFAYVVTHLPRFLLQYDGHWKHYLPSDMYIARNDLSNYFMCCHPLFSFADYLIFSEKYRKSVKSILKRQPSGNSSRKAPQSV	0
