# Supplementary material for: Sensory Plasticity Caused by Up-down Regulation Encodes the Information of Short-term Learning and Memory
Source: Research Square preprint supplement (doi:10.21203/rs.3.rs-4917555/v1), 2024-09-24
Supplement: Supplementary file 3 [file b1699d57e5152351d3cbbabb.docx]

**Supplementary table 3**

**Table S3. List of oligonucleotides used in this study. Related to all figures**

| **Name of DNA fragment** | **PCR product length** | | **Sequence of primers. F, forward**; **R, reverse** |
| --- | --- | --- | --- |
| *frpr-10p* (1 kb) | 1.0 kb | | F: tataactccgttcgtgtgtg  R: aattgaagatgtaagtagaac |
| *frpr-10p* (2 kb) | 2.0 kb | | F: tgcggtcgtgcgtgcagcttc  R: aattgaagatgtaagtagaac |
| *frpr-10p* (4 kb) | | 4.0 kb | F: cgatttttaattatttggcag  R: aattgaagatgtaagtagaac |
| *frpr-10* (*RNAi*, *sense*) | | 939 bp | F: tacgcaatattcaagcttc  R: acattccagtagtttcttc |
| *frpr-10* (*RNAi*, *antisense*) | | 939 bp | F: tacattccagtagtttcttc  R: acgcaatattcaagcttcc |
| *frpr-10* (*DNA*) | | 2.2 kb | F: atgatatatccatcaatgc  R: attaacatgctgctggcatttcc |
| *nlr-1p* | | 3.0 kb | F: ctactgtaccatgttctctg  R: tcgaatccggagggcatatg |
| *npr-1p* | | 3.5 kb | F: cagctgatgcttttgaaattg  R: agtctaatggaggaaagaaaaat |
| *npr-1* (cDNA) | | 1.3 kb | F: atggaagttgaaaattttaccg  R: tcagactagcgtgtcgttga |
| *flp-11p* | | 2.0 kb | F: gttccctctgactattcatc  R: tattcagtatgaactgcaa |
| *unc-47p* | | 1.2 kb | F: gggatcccggaacagtcg  R: ctgtaatgaaataaatgtg |
| *frpr-1p* | | 2.5 kb | F: tcagaactgccaaaaattcagc  R: cataaactggatctgtggtgt |
| *frpr-2p* | | 3.1 kb | F: ggagtttccaacttgactttcac  R: ctctgctttgcatagcaattctg |
| *frpr-7p* | | 3.0 kb | F: gcatagagcaacttgcaca  R: tactggaggcatgagaagac |
| *frpr-9p* | | 3.0 kb | F: tcagttttcgagactgatgg  R: cagtctgaaagcacgaacttg |
| *frpr-14p* | | 1.0 kb | F: aaacggaactttcatgggc  R: tgcaaagatgagctacaagtc |
| *frpr-17p* | | 3.0 kb | F: ctcactgatggttgaggttg  R: cgaaaatagaaatgatgacgagc |
| *npr-24p* | | 3.0 kb | F: tgctccacagctcgataattc  R: ctggatttctatatcaaaagcgac |
| *npr-39p* | | 1.9 kb | F: tgttatgataggaacgcccat  R: gaatctgaaacgtggagaagt |

| *npr-41p* | 2.0 kb | F: cattccgcactcttcctcc  R: ctgcaatgaggaggtcagc |
| --- | --- | --- |
| *npr-42p* | 2.0 kb | F: atcctgtgcttttcagaatgag  R: GTCCATtttttgaggtctgga |
| *fpr-1* (*RNAi*, *sense*) | 862 bp | F: atacctatttgcgcttgcc  R: gtactcaccagaacattacacg |
| *frpr-1* (*RNAi*, *antisense*) | 862 bp | F: gtactcaccagaacattacacg  R: atacctatttgcgcttgcc |
| *frpr-2* (*RNAi*, *sense*) | 751 bp | F: cgtccggattcgagttaatttc  R: aggcgcaaacacaatctatg |
| *frpr-2* (*RNAi*, *antisense*) | 751 bp | F: aggcgcaaacacaatctatg  R: cgtccggattcgagttaatttc |
| *frpr-7* (*RNAi*, *sense*) | 807 bp | F: tgtatggccaacgacattc  R: ttgtgctcattcccgctg |
| *frpr-7* (*RNAi*, *antisense*) | 807 bp | F: ttgtgctcattcccgctg  R: tgtatggccaacgacattc |
| *frpr-9* (*RNAi*, *sense*) | 750 bp | F: gtattcaggtgctctcaatttcc  R: ttaaagttccgtccctcgg |
| *frpr-9* (*RNAi*, *antisense*) | 750 bp | F: ttaaagttccgtccctcgg  R: gtattcaggtgctctcaatttcc |
| *frpr-14* (*RNAi*, *sense*) | 675 bp | F: ccagCTCTGGCTTACCTC  R: ccccgtcaaagtctaaaatcc |
| *frpr-14* (*RNAi*, *antisense*) | 675 bp | F: ccccgtcaaagtctaaaatcc  R: ccagCTCTGGCTTACCTC |
| *frpr-17* (*RNAi*, *sense*) | 744 bp | F: gcatattttcagaaatgcgatgt  R: actgtttgaagcgactcacc |
| *frpr-17* (*RNAi*, *antisense*) | 744 bp | F: actgtttgaagcgactcacc  R: gcatattttcagaaatgcgatgt |
| *npr-24* (*RNAi*, *sense*) | 663 bp | F: aagttaccgcaattcggtc  R: ctgccccattcaaaagtttc |
| *npr-24* (*RNAi*, *antisense*) | 663 bp | F: ctgccccattcaaaagtttc  R: aagttaccgcaattcggtc |
| *npr-39* (*RNAi*, *sense*) | 740 bp | F: cctgcggtgaaactatttg  R: GGCTGCAAAGTGAGTACAC |
| *npr-39* (*RNAi*, *antisense*) | 740 bp | F: GGCTGCAAAGTGAGTACAC  R: cctgcggtgaaactatttg |
| *npr-41* (*RNAi*, *sense*) | 640 bp | F: GACGAACTAATCACCCTGGA  R: aatgctatgtggaaatggatttg |
| *npr-41* (*RNAi*, *antisense*) | 640 bp | F: aatgctatgtggaaatggatttg  R: GACGAACTAATCACCCTGGA |
| *npr-42* (*RNAi*, *sense*) | 745 bp | F: aacgtattcctattgtcagtcag  R: caggcagactttacatagcg |
| *npr-42* (*RNAi*, *antisense*) | 745 bp | F: caggcagactttacatagcg  R: aacgtattcctattgtcagtcag |
| *npr-24* (*DNA*) | 3.4 kb | F: atgatgaacaacaccaacgaac  R: tcagcagctactgtaatgagaa |
| *inx-7* (*RNAi*, *sense*) | 876 bp | F: taatacatgctcccacatgatc  R: atctagatttgacatttttct |
| *inx-7* (*RNAi*, *antisense*) | 876 bp | F: tatctagatttgacatttttct  R: aatacatgctcccacatgatc |
| *inx-6* (*RNAi*, *sense*) | 964 bp | F: tagccgaccgtctcaactcgag  R: actgtacactagccggccgtc |
| *inx-6* (*RNAi*, *antisense*) | 964 bp | F: tactgtacactagccggccgtc  R: agccgaccgtctcaactcgag |
| *unc-9* (*RNAi*, *sense*) | 1.2 kb | F: tagaattcatgtgcagtctctg  R: actgtcttaaaaagtgaaatac |
| *unc-9* (*RNAi*, *antisense*) | 1.2 kb | F: tactgtcttaaaaagtgaaatac  R: agaattcatgtgcagtctctg |
| *unc-25* (*RNAi*, *sense*) | 1.1 kb | F: tactgccgatttgccgattcgtc  R: attgtacgcatcctatgaata |
| *unc-25* (*RNAi*, *antisense*) | 1.1 kb | F: tattgtacgcatcctatgaata  R: actgccgatttgccgattcgtc |
| *egl-3* (*RNAi*, *sense*) | 1.1 kb | F: taaatgccgaagcttcatacg  R: atgtggagtgtcaatgagtcc |
| *egl-3* (*RNAi*, *antisense*) | 1.1 kb | F: tatgtggagtgtcaatgagtcc  R: aaatgccgaagcttcatacg |
| *acy-1* (*RNAi*, *sense*) | 806 bp | F: tttatgactgttccgaattcccc  R: atgaacttgcatcctcaatggac |
| *acy-1* (*RNAi*, *antisense*) | 806 bp | F: ttgaacttgcatcctcaatggac  R: attatgactgttccgaattcccc |
| *egl-30* (*RNAi*, *sense*) | 604 bp | F: tcagtctatgatacgagcgatgg  R: actcgttgtcacactcgac |
| *egl-30* (*RNAi*, *antisense*) | 604 bp | F: tctcgttgtcacactcgac  R: acagtctatgatacgagcgatgg |
| *gsa-1* (*RNAi*, *sense*) | 481 bp | F: ttatgtgtttccaggagttctacg  R: atcaccgattttgtgtattgtcc |
| *gsa-1* (*RNAi*, *antisense*) | 481 bp | F: ttcaccgattttgtgtattgtcc  R: atatgtgtttccaggagttctacg |
| *goa-1* (*RNAi*, *sense*) | 855 bp | F: catcagcgaataaagttatcgag  R: ctcgaacgaccaagtcatg |
| *goa-1* (*RNAi*, *antisense*) | 855 bp | F: ctcgaacgaccaagtcatg  R: catcagcgaataaagttatcgag |
| *pdf-2* (*RNAi*, *sense*) | 343 bp | F: AGTGGCAACCATGTTCTTCAC  R: TTACTTGCCAACGTCTCCAAG |
| *pdf-2* (*RNAi*, *antisense*) | 343 bp | F: TTACTTGCCAACGTCTCCAAG  R: AGTGGCAACCATGTTCTTCAC |
| *pdfr-1* (*RNAi*, *sense*) | 910 bp | F: gagcaacagactttaaaatgc  R: tgatttttacCTCCTTGTTCG |
| *pdfr-1* (*RNAi*, *antisense*) | 910 bp | F: tgatttttacCTCCTTGTTCG  R: gagcaacagactttaaaatgc |

| *TeTx* | 1.4 kb | F: taatgccaattacaatcaacaac  R: attaagctgttctattataaag |
| --- | --- | --- |
| *G-CaMP3.0* | 1.4 kb | F: taatgggatcgcaccaccacc  R: attatttagctgtcatcatttg |
| *ops-1p* | 2.0 kb | F: aaaagattttttaggacattg  R: tcatttttagagtttctgga |
| *cat-2p* | 1.6 kb | F: atgcaaaactattagaggacat  R: ttcctcttccaatttttcaagg |
| *glr-1p* | 2.7 kb | F: tttcaagtgtcctgttgtca  R: tgtgaatgtgtcagattggg |
| *flp-17p* | 3.3 kb | F: TTCCTCTGAAATTATAATAT  R: CTGGAAAAATAAAGTTTTGC |
| *pdf-2p* | 2.9 kb | F: TGCCCACAGATCGGCTTATGATTGC  R: CTGGAAAAAGTAGCAAGTTG |
| *pdf-2 (DNA)* | 384 bp | F: atgagctctcgaatttcgg  R: ttacttgccaacgtctcc |
| *pdfr-1p* | 5 kb | F: aaaaggttaagcgcccttg  R: ttcaattcgacgtttgacca |
| *pdfr-1* (*cDNA*) | 1.6 kb | F: taatatggcggatgccacgtca  R: attactactcttcatacccttca |
| *gcy-5p* | 3.2 kb | F: tagacaagtgttttggcatg  R: ttttcatcagaataagtaat |
| *gcy-6p* | 2.0 kb | F: gcaaatccatgcgatagacaag  R: tcactggaaaggagttatg |
| *flp-14p* | 2.0 kb | F: cggagctcatacgaagaag  R: atgaagagagctctcagttggag |
| *flp-14* (*cDNA*) | 1.5 kb | F: taatgatgatctgcctgcccac  R: attatttgcgtccgaaacgca |
| *R-GECO1.0* | 968 bp | F: taatggtcgactcttcacgtcg  R: actacttcgctgtcatcatttg |
| *sl2e*::*TagRFP-t* | 797 bp | F: taatggtgtctaagggcgaa  R: attacttgtacagctcgtccatgcc |
| *sra-6p* | 3.8 kb | F: ccttcagtgcctacgtgccag  R: caaaatctgaaataata |
| *gpa-4p* | 2.4 kb | F: tgcgactttcgatacgtagg  R: gaaaagtgttcacaaa |
| *tdc-1p* | 3.0 kb | F: gtttacgggcttggcgag  R: ttatattggggtttgcaatc |
| *tdc-1* (*DNA*) | 2.4 kb | F: taatggtttacgggcttggcgag  R: attacgaaaccaatatctgtg |
| *tbh-1p* | 4.5 kb | F: tatcgattaattttctccatc  R: gcaacggcacttctcatttttc |
| *gcy-13p* | 2.3 kb | F: gtggccacaatgacaattatc  R: gtcctgaaaaattattgaaag |
| *tyra-2p* | 3.5 kb | F: cgctattgatcctaactcc  R: ctgaaaaaacacagttagcttg |
| *tbh-1* (*cDNA*) | 1.8 kb | F: taatgagaagtgccgttgctc  R: attactcaaaattaatcatgtc |
| *tyra-2* (*cDNA*) | 1.4 kb | F: taatgatgtcgagttatgtgatg  R: attagacacgagaagttgagc |
| *ntsr-1* (*cDNA* inhuman) | 1.2 kb | F: atgcgcctcaacagctc  R: ctagtacagcgtctcgcg |
| *ntsr-1* (*cDNA* in rat) | 1.2 kb | F: atgcacctcaacagctcc  R: ctagtacagggtttcccgg |
| *T19C4.5p* | 4.0 kb | F: caaaactattttgaatgcaa  R: tcatttcttaccgtaacccac |
| *ttx-3p* | 3.1 kb | F: gtataacaatactagtga  R: gtaggaagcattgatat |
| *octr-1p* | 3.9 kb | F: atcacgtctacatatctcaatc  R: tatgtgatgttatttgttca |
| *octr-1* (*cDNA*) | 1.2 kb | F: taatgtggaaccttaactgcag  R: atcatttgtagaactccatgag |
| *ver-2p* | 2.7 kb | F: taaataaaacgtaatatattg  R: tcatgcaatttagttttttatac |
| *gcy-8p* | 593 bp | F: gggcgaattgggtacattag  R: ttttgatgtggaaaaggtag |
| *str-2p* | 3.7 kb | F: agagacaggatacaactg  R: tttttatggatcacgagtattc |
| *npr-9p* | 1.7 kb | F: gttgggttgatgacgacgtc  R: tgctctaaaattacaataaag |
| *unc-86p* | 3.5 kb | F: agctatcaaagtagagcagtg  R: taccttgaagctgggaggagac |
| *gcy-28*(*d*)*p* | 2.8 kb | F: tacaattgtagtgagcttcg  R: tttcgcactcatctcaccattc |
| *sra-9p* | 3.5 kb | F: gcatgctatattccaccaa  R: tttctatgattgatgcacaag |
